# Supplementary material for: H2O2 Functions as a Downstream Signal of IAA to Mediate H2S-Induced Chilling Tolerance in Cucumber
Source: MDPI journal article supplement (doi:10.3390/ijms222312910), 2021-11-29
Supplement: s1 [file s1]

# H<sub>2</sub>O<sub>2</sub> Functions as a Downstream Signal of IAA to Mediate H<sub>2</sub>S-Induced Chilling Tolerance in Cucumber

Xiaowei Zhang, Yanyan Zhang, Chenxiao Xu, Kun Liu, Huangai Bi and Xizhen Ai \*

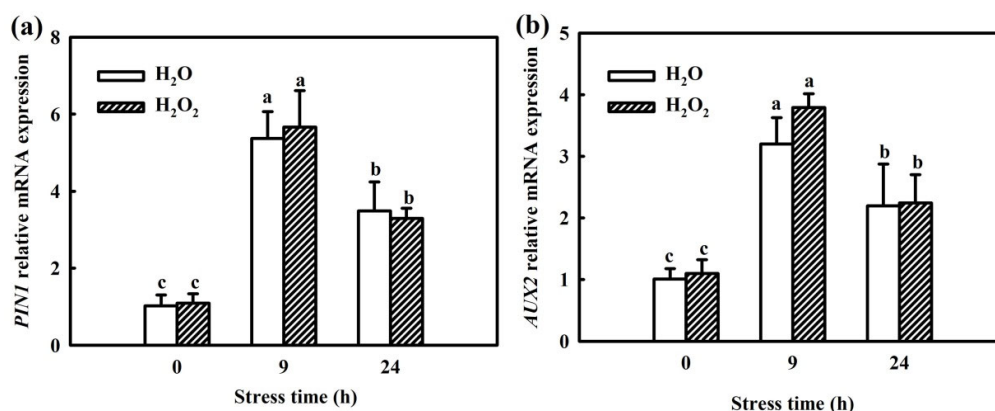

**Figure S1.** Effect of H<sub>2</sub>O<sub>2</sub> on the mRNA expressions of *PIN1* and *AUX2* under chilling stress. (a) qRT-PCR analysis the expression of *PIN1*; (b) qRT-PCR analysis the expression of *AUX2*. Cucumber seedlings were pretreated with 1.0 mM H<sub>2</sub>O<sub>2</sub> or deionized water (H<sub>2</sub>O) for 6 h, and subsequently were exposed to chilling stress (5 °C) for 24 h. qRT-PCR was performed in three biological replicates and three technical replicates. Deionized water treated seedlings before chilling stress were used as the control. Error bars denote standard deviations. Different letters above the bars indicate significant differences ( $P < 0.05$ ) based on Duncan's multiple range tests.

**Table S1.** Primers for qRT-PCR analysis.

| Gene          | Sequences                    |
|---------------|------------------------------|
| <i>RBOH1</i>  | F: TTGCTGGGAAGAGTGGGT        |
|               | R: GCTCCAATACCAAGACCAAC      |
| <i>YUCCA2</i> | F: TTCTGTCAACTTCCCAACTCCCTT  |
|               | R: GGAAGTTGGGAAGTTGACAGAATTG |
| <i>RCA</i>    | F: AAAGTGGGCTGTAGGCGTTG      |
|               | R: CTTTCTATTGTTCATCTTCGGTTGG |
| <i>rbcL</i>   | F: GCTATGGAATCGAGCCTGTTG     |
|               | R: CCAAATACATTACCCACAATGGAAG |
| <i>rbcS</i>   | F: CGCATTTCATCAGGGTTATTGG    |
|               | R: AAGAGTAGAACTTGGGGCTTGAGG  |
| <i>CBF1</i>   | F: ATGGCTTCATATTGCTCTGAG     |
|               | R: ATGCCTCAAGTCAATTGCTTG     |
| <i>ICE1</i>   | F: CGCATCGAGTTGGCTCTGGTG     |

---

|              |                              |
|--------------|------------------------------|
|              | R:GTCCTCATCGCCGTTTCATCTTCC   |
| <i>COR47</i> | F:CACTTTGAGAGGACATTTGATG     |
|              | R:AGAAGCTCCAATTTTGA CTG      |
| <i>PIN1</i>  | F: GTAGAGAGAACCAGGAGGAA      |
|              | R: CAAGATTAGCCTTGTCATAA      |
| <i>AUX2</i>  | F: CTTCTAAACCATTCCAACGC      |
|              | R: AAACAAATGCTCTTCGTATC      |
| <i>Actin</i> | F:CCACGAAACTACTTACA ACTCCATC |
|              | R:GGGCTGTGATTCCTTGCTC        |

---
